# Supplementary material for: 3D-Printed Coating of Extended-Release Matrix Tablets: Effective Tool for Prevention of Alcohol-Induced Dose Dumping Effect
Source: MDPI journal article supplement (doi:10.3390/pharmaceutics13122123), 2021-12-09
Supplement: s1 [file s1]

## Supplementary data – dissolution tests at pH 6.8

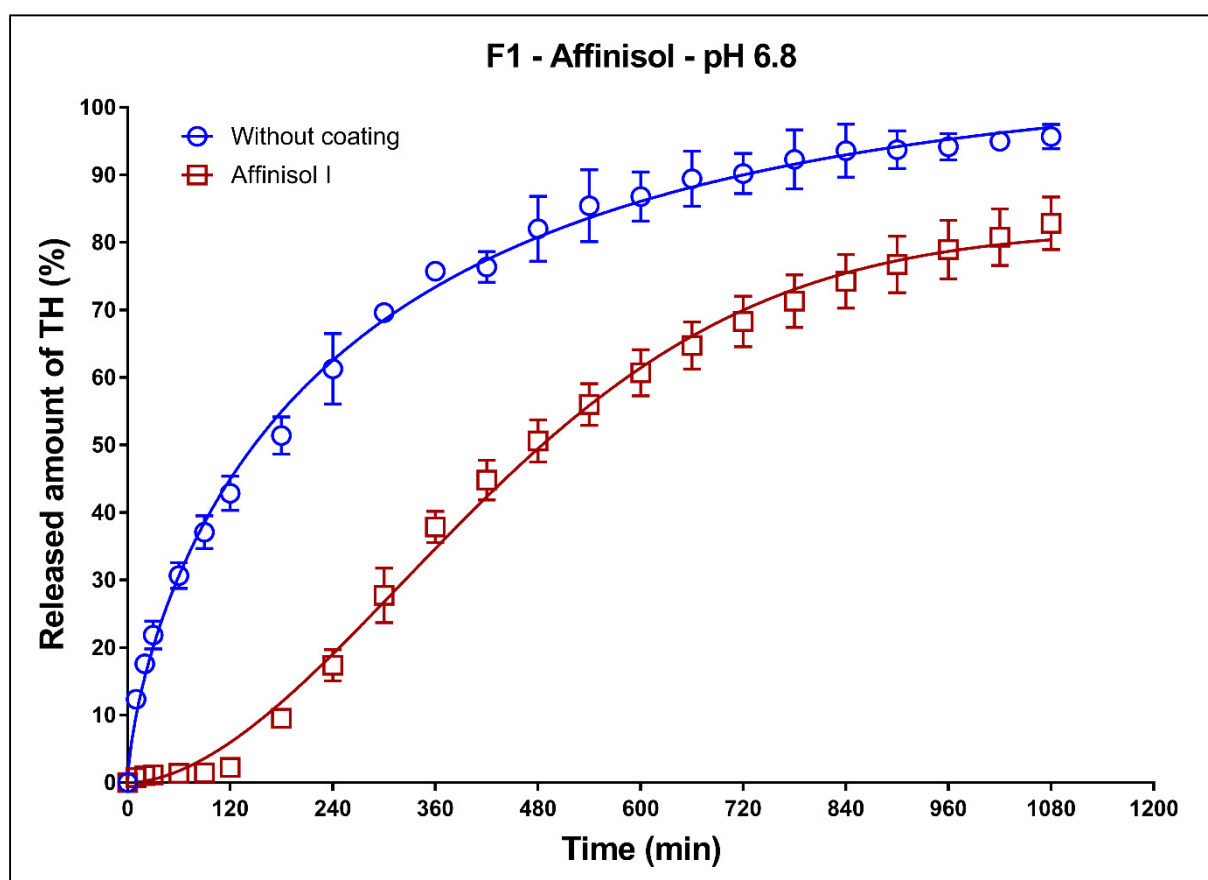

**Figure S1:** Dissolution profiles of F1 formulation at pH 6.8 fitted to the Weibull model – uncoated tablets and tablets with Affinisol coating (one perimeter thickness).

**Table S1:** Non-linear regression analysis of the dissolution profiles of F1 formulation in pH 6.8 medium – uncoated tablets and tablets with Affinisol coating (one perimeter thickness).

|                 | Weibull model                                      |                         |                |     |        |
|-----------------|----------------------------------------------------|-------------------------|----------------|-----|--------|
|                 | $(k_w \pm SD) \times 10^3$<br>(min <sup>-β</sup> ) | $A_{\infty} \pm SD$ (%) | $\beta \pm SD$ | ASS | $R^2$  |
| Without coating | 19.93 ± 2.4                                        | 105 ± 2.92              | 0.69 ± 0.03    | 314 | 0.9927 |
| Affinisol I     | 0.01 ± 0.006                                       | 81.88 ± 1.63            | 1.81 ± 0.08    | 323 | 0.9930 |

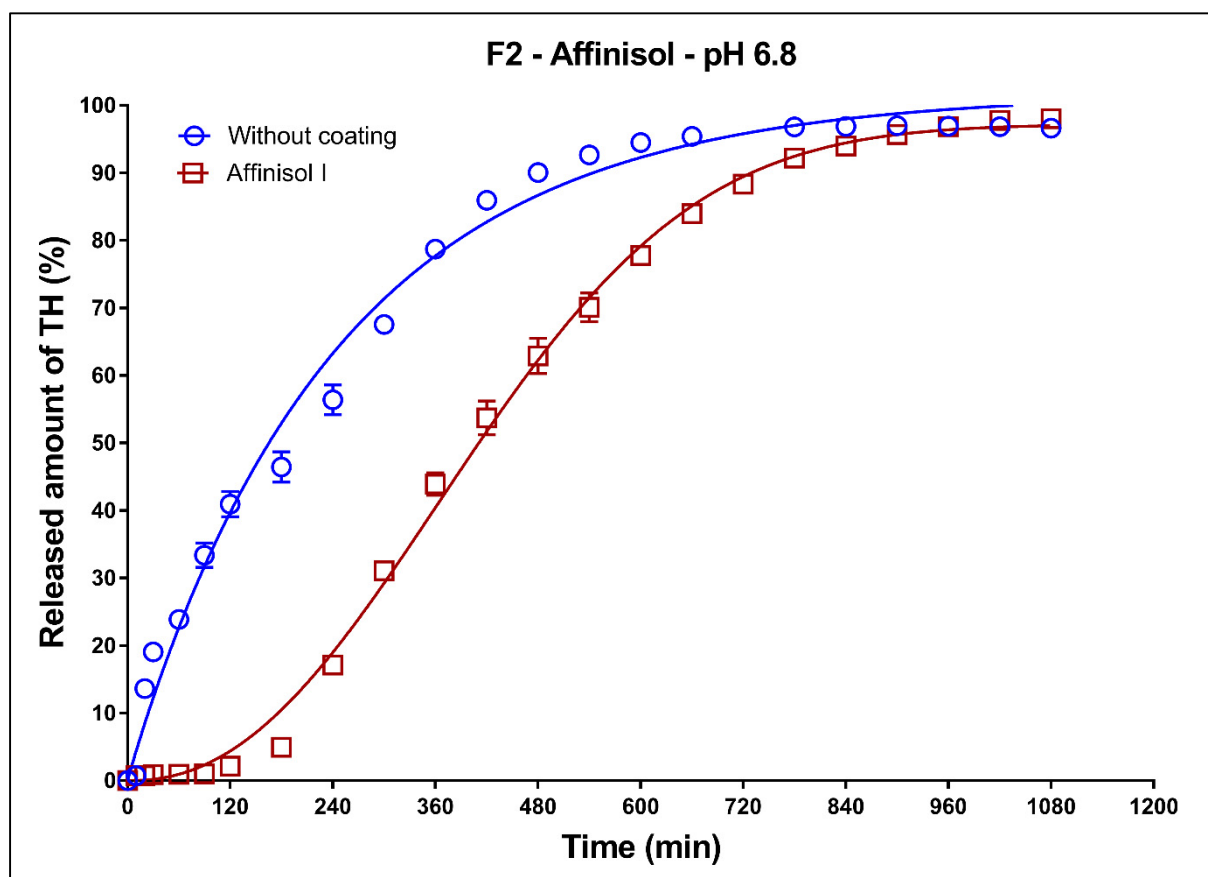

**Figure S2:** Dissolution profiles of F2 formulation in pH 6.8 medium fitted to the Weibull model – uncoated tablets and tablets with Affinisol coating (one perimeter thickness).

**Table S2:** Non-linear regression analysis of the dissolution profiles of F2 formulation in pH 6.8 medium – uncoated tablets and tablets with Affinisol coating (one perimeter thickness).

|                 | Weibull model                                      |                         |                |     |        |
|-----------------|----------------------------------------------------|-------------------------|----------------|-----|--------|
|                 | $(k_w \pm SD) \times 10^3$<br>(min <sup>-β</sup> ) | $A_{\infty} \pm SD$ (%) | $\beta \pm SD$ | ASS | $R^2$  |
| Without coating | 4.68 ± 1.3                                         | 101.8 ± 2.08            | 0.97 ± 0.05    | 840 | 0.9852 |
| Affinisol I     | 0.001 ± 0.003                                      | 97.2 ± 0.74             | 2.23 ± 0.06    | 166 | 0.9933 |

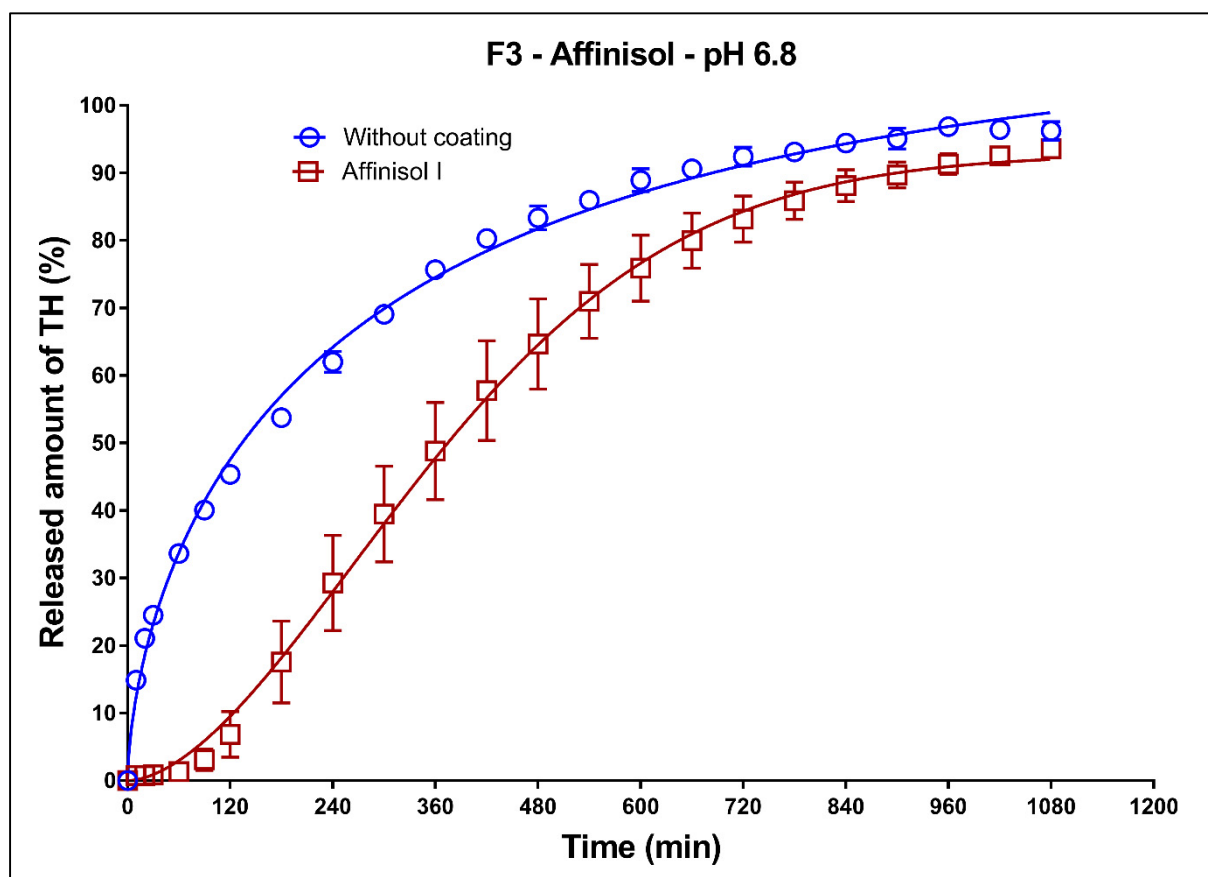

**Figure S3:** Dissolution profiles of F3 formulation in pH 6.8 medium fitted to the Weibull model – uncoated tablets and tablets with Affinisol coating (one perimeter thickness).

**Table S3:** Non-linear regression analysis of the dissolution profiles of F3 formulation in pH 6.8 medium – uncoated tablets and tablets with Affinisol coating (one perimeter thickness).

|                 | Weibull model                                      |                         |                |     |        |
|-----------------|----------------------------------------------------|-------------------------|----------------|-----|--------|
|                 | $(k_w \pm SD) \times 10^3$<br>(min <sup>-β</sup> ) | $A_{\infty} \pm SD$ (%) | $\beta \pm SD$ | ASS | $R^2$  |
| Without coating | 27.9 ± 2.04                                        | 111.2 ± 2.87            | 0.63 ± 0.02    | 158 | 0.9963 |
| Affinisol I     | 0.028 ± 0.01                                       | 92.7 ± 1.51             | 1.73 ± 0.08    | 471 | 0.9924 |
